# Supplementary material for: Determinants of Health Supply Chain Performance in Baringo County – Kenya
Source: Research Square preprint supplement (doi:10.21203/rs.3.rs-8252964/v1), 2025-12-24
Supplement: Supplementary file 1 [file 57643bfbf2d1166778b01f58.pdf]

## APPENDIX I: DATA COLLECTION TOOL

### PROJECT TITLE: DETERMINANTS OF HEALTH SUPPLY CHAIN PERFORMANCE IN BARINGO COUNTY

QUESTIONNAIRE CODE: .....

DATE: .....

All the information received will be treated confidentially

Instructions:

Please complete the questionnaire below

☐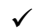

Tick where appropriate.

#### SECTION 1: “Details of the respondents”

##### 1. What is your Name? (Optional)

Enter your name or initials

##### 2. Gender of participant

☐

Male

☐

Female

##### 3. Age of participant

☐

21 - 30

☐

31 - 40

☐

41 - 50

☐

51 – 60

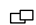

##### 4.

What is your role in the organization

|                          |                                                  |
|--------------------------|--------------------------------------------------|
| <input type="checkbox"/> | <b>Pharmacist</b>                                |
| <input type="checkbox"/> | <b>Pharmaceutical Technologist</b>               |
| <input type="checkbox"/> | <b>Nurse</b>                                     |
| <input type="checkbox"/> | <b>Laboratory Technologist/Technician</b>        |
| <input type="checkbox"/> | <b>Nutritionist</b>                              |
| <input type="checkbox"/> | <b>Medical Officer of Health</b>                 |
| <input type="checkbox"/> | <b>Public Health Officer</b>                     |
| <input type="checkbox"/> | <b>Health Records and Information Officer</b>    |
| <input type="checkbox"/> | <b>Medical Superintendent / Hospital Manager</b> |
| <input type="checkbox"/> | <b>Sub County Health Services Coordinator</b>    |
| <input type="checkbox"/> | <b>Health Administrative Officer</b>             |
| <input type="checkbox"/> | <b>Procurement Officer</b>                       |
| <input type="checkbox"/> | <b>Supply Chain Officer</b>                      |
| <input type="checkbox"/> | <b>Store Keeper</b>                              |
| <input type="checkbox"/> | <b>Student (Pharmacy, Nurse, etc.</b>            |
| <input type="checkbox"/> | <b>Other, specify</b>                            |

#### **5. Years of Experience**

|                          |                     |
|--------------------------|---------------------|
| <input type="checkbox"/> | <b>&lt; 1 year</b>  |
| <input type="checkbox"/> | <b>1 – 3 years</b>  |
| <input type="checkbox"/> | <b>4 – 6 years</b>  |
| <input type="checkbox"/> | <b>7 – 10 years</b> |
| <input type="checkbox"/> | <b>➤ 10 years</b>   |

#### **6. Level of Service**

|                                                                                   |                         |
|-----------------------------------------------------------------------------------|-------------------------|
|  | <b>County Level</b>     |
|  | <b>Sub County Level</b> |
|  | <b>Facility Level</b>   |

**In the following sections (Sections 2 - 6). For the 5-point Likert scale questions; “Please rate your level of agreement with the following statements on a scale from 1 (Strongly Disagree) to 5 (Strongly Agree)”.**

**SECTION 2: Health Supply Chain Performance – Key Performance Indicators (KPIs) – {Availability, Timeliness, Cost, Efficiency, System Reliability, Quality and Satisfaction}**

| No | Statement                                                      | 1 | 2 | 3 | 4 | 5 |
|----|----------------------------------------------------------------|---|---|---|---|---|
| 1  | Essential medicines are consistently available at the facility |   |   |   |   |   |
| 2  | Stock outs of key supplies are rare                            |   |   |   |   |   |
| 3  | Deliveries arrive within the agreed time frame                 |   |   |   |   |   |
| 4  | Urgent supply needs are addressed promptly                     |   |   |   |   |   |
| 5  | Inventory records accurately reflect stock levels              |   |   |   |   |   |
| 6  | The supply chain responds quickly to changes in demand         |   |   |   |   |   |
| 7  | The supply chain minimizes wastage and inefficiencies          |   |   |   |   |   |
| 8  | Cost associated with inventory storage are well managed        |   |   |   |   |   |
| 9  | I am satisfied with the performance of the health supply chain |   |   |   |   |   |
| 10 | Communication within the supply chain is effective             |   |   |   |   |   |

**SECTION 3: Objective 1 – Physical Infrastructure**

| No | Statement                                                                | 1 | 2 | 3 | 4 | 5 |
|----|--------------------------------------------------------------------------|---|---|---|---|---|
| 1  | Storage facilities are adequate for current health supply chain needs    |   |   |   |   |   |
| 2  | Transportation infrastructure ensures timely delivery of health products |   |   |   |   |   |

|   |                                                                          |  |  |  |  |  |
|---|--------------------------------------------------------------------------|--|--|--|--|--|
| 3 | Cold chain equipment is functional and meets requirement for temperature |  |  |  |  |  |
| 4 | Health facilities have sufficient space for inventory storage            |  |  |  |  |  |

#### **SECTION 4: Objective 2 – Information systems**

| No | Statement                                                                  | 1 | 2 | 3 | 4 | 5 |
|----|----------------------------------------------------------------------------|---|---|---|---|---|
| 1  | The information systems effectively tracks stock levels and usage patterns |   |   |   |   |   |
| 2  | Inventory data is updated in real-time using the information system        |   |   |   |   |   |
| 3  | The information system reduces errors in inventory management              |   |   |   |   |   |
| 4  | Staff are well – trained in using the supply chain information system      |   |   |   |   |   |

#### **SECTION 5: Objective 3 – Procurement and Sourcing Practices**

| No | Statement                                                                    | 1 | 2 | 3 | 4 | 5 |
|----|------------------------------------------------------------------------------|---|---|---|---|---|
| 1  | Procurement processes ensure timely acquisition of essential health products |   |   |   |   |   |
| 2  | Sourcing practices prioritize cost-efficiency and quality of health products |   |   |   |   |   |
| 3  | Suppliers consistently meet delivery deadlines                               |   |   |   |   |   |
| 4  | Procurement policies are transparent and comply with regulations             |   |   |   |   |   |

#### **SECTION 6: Objective 4 – Employee Competencies**

| No | Statement | 1 | 2 | 3 | 4 | 5 |
|----|-----------|---|---|---|---|---|
|----|-----------|---|---|---|---|---|

|   |                                                                                  |  |  |  |  |  |
|---|----------------------------------------------------------------------------------|--|--|--|--|--|
| 1 | Supply chain personnel have the necessary skills to manage inventory effectively |  |  |  |  |  |
| 2 | Employees receive regular training to enhance their competencies                 |  |  |  |  |  |
| 3 | Communication among supply chain staff is efficient and effective                |  |  |  |  |  |
| 4 | Employees understand their roles and responsibilities in supply chain management |  |  |  |  |  |

**THANK YOU**

**-----THE END -----**
